# Supplementary material for: Permafrost Active Layer Microbes From Ny Ålesund, Svalbard (79°N) Show Autotrophic and Heterotrophic Metabolisms With Diverse Carbon-Degrading Enzymes
Source: Front Microbiol. 2022 Feb 3;12:757812. doi: 10.3389/fmicb.2021.757812 (PMC8851200; doi:10.3389/fmicb.2021.757812)
Supplement: Supplementary file 1 [file Table_1.XLSX]

## Sheet: README
By Katie Sipes	Cell count data and calucalation to supplement Frontiers submission
Permafrost active layer microbes from Ny Ålesund, Svalbard (79°N) show autotrophic and heterotrophic metabolisms with diverse carbon-degrading enzymes
REAGAN PAUL did a 24 hour growth period and then did cell counts with 1mL of culture. Looked at them under 100X. Did 30 fields of view.
Sheet one in the calcualtions and the diltions.
Enzyme assay was done with 20mL of 24hr old culture.
Cell count was done with 1mL of 24hour old culture.
Sheet 2 is cleaned to put into R
Sheet 3 is Svalbard Soil Slurry is the cell counts on the Svalbard Active layer depth
Sheet 4 is Amount sample used in a sheet for the Svalbard active layer soil slurry cell counts.
Sheet 5 is the Soil slurry calculations used in R
Sheet 6 is the Elemental Analyzer values
Sheet 7 is the soil extractable compound values

## Sheet: Sheet1-Dilutions
Experiment:	Svalbard 2018 BPF Active Layer Samples
Sample Description:
Temp:
Date:
Notes:
Dilution =	0.05		0.8			100000	490870000
	ml diluted of sample		ml PBS Dilutant			Grid area ym	FIlter area ym
Sample filtered (ml)			1
Grid:Area CF			6400
Dilution Factor			40
G:A x Dilution Corr. Factor			160
									Grids
Sample	Probe	diltion	cells/ml	std dev cells		STD dev	avg cells	total cells	1	2	3	4	5	6	7	8	9	10	11	12	13	14	15	16	17	18	19	20	21	22	23	24	25	26	27	28	29	30	Date	Initials
B3	SYBR GOLD	0.05	7540.78	368.253		1.50041	1.58621	48	2	0	0	3	2	1	0	0	6	2	3	4	1	2	0	1	1	1	2	0	4	1	3	2	2	1	0	0	1	3
B4	SYBR GOLD	0.05	15532.5	587.516		2.39377	3.21429	109	8	11	10	4	1	2	2	3	0	2	4	1	4	3	3	1	4	1	3	6	2	4	6	0	3	8	3	1	2	7
B5	SYBR GOLD	0.05	10623.8	429.581		1.75028	2.21429	65	0	3	4	3	3	4	1	1	0	2	2	1	4	2	0	5	3	3	2	1	0	6	0	1	3	2	6	2	1	0
B7	SYBR GOLD	0.1	35447.8	1721.57		3.50717	7.32143	229	17	7	13	6	8	16	8	6	15	5	7	9	2	8	7	3	12	6	8	3	7	8	7	4	9	4	3	10	4	7
E5	SYBR GOLD	0.1	385.684	191.45		0.390021	0.178571	5	0	0	0	0	1	0	0	0	0	1	0	0	0	0	0	1	0	0	0	1	0	0	0	0	0	0	1	0	0	0
E6	SYBR GOLD	0.1	24227.9	1021.67		2.08135	5.03571	150	4	5	3	3	4	5	5	8	4	5	4	3	5	5	7	5	3	4	5	2	7	3	5	6	4	7	7	7	12	3
E7	SYBR GOLD	0.1	21773.6	1616.93		3.29401	4.53571	135	4	4	9	3	3	6	3	7	2	8	7	4	3	4	2	3	8	3	5	1	16	5	1	2	9	1	4	2	3	3
G16	SYBR GOLD	0.025	23193.6	298.033		2.42861	4.75	145	6	6	4	3	7	4	1	1	2	9	3	6	9	4	7	5	3	5	5	2	8	8	8	4	3	6	7	4	4	1
G17	SYBR GOLD	0.025	15479.9	332.41		2.70875	3.17857	104	7	8	3	3	2	9	2	9	5	5	2	1	3	1	5	0	1	3	6	0	0	4	6	3	0	2	3	1	1	9
G19	SYBR GOLD	0.025	23719.5	274.84		2.23961	4.85714	141	2	3	4	5	10	7	7	5	5	5	7	1	4	4	6	6	6	6	1	6	7	2	5	4	4	4	2	9	2	2

## Sheet: Sheet2-Cultures cells_mL
Sample	cellsml	stddevcells
B3	7540.78	368.253
B4	15532.5	587.516
B5	10623.8	429.581
B7	35447.8	1721.57
E5	385.684	191.45
E6	24227.9	1021.67
E7	21773.6	1616.93
G16	23193.6	298.033
G17	15479.9	332.41
G19	23719.5	274.84

## Sheet: Sheet3 - Svalbard Soil Slurry
	Experiment:	Svalbard Active Layer 2018 Soil Interval Cell counts
	Sample Description:	Samples BPF1 and BPF2, 8 soil intervals
	Date:	2019-08-01
	Notes:
	Dilution =	0.05		0.95			100000	490870000
		ml diluted of sample		ml PBS Dilutant			Grid area µm2	FIlter area µm2
	Sample applied to filtered (ml)			On Sheet called amount sample used
	Grid:Area CF			6400
	Dilution Factor			0.05
	G:A x Dilution Corr. Factor			128000
									Grids
	Sample Name	Stain	cells/g	std dev cells	NORMALIZED CELLS	NORMALIZED STD	STD dev	avg cells	total cells	1	2	3	4	5	6	7	8	9	10	11	12	13	14	15	16	17	18	19	20	21	22	23	24	25	26	27	28	29	30	Date	Initials
	BPF1 0-12cm 1:10	SYBR	181513	33272.3	178404	37640.6	10.1673	27.7333	832	23	26	31	30	13	8	38	13	23	26	36	29	27	15	34	11	37	15	41	46	35	37	33	41	21	24	21	39	37	22	19/06/19	RP
	BPF1 0-12 cm 1:20	SYBR	53123	17751.9	50014.2	22120.2	5.42461	16.2333	487	11	6	21	9	16	13	22	16	14	24	12	23	19	16	17	13	28	25	13	17	18	20	14	13	22	15	7	16	8	19	19/06/19	RP
	BPF1 0-12 cm 1:40	SYBR	12108.1	7499.39	8999.28	11867.7	2.29166	3.7	111	3	9	1	4	0	2	3	3	5	4	2	4	6	4	6	8	2	0	3	4	6	3	5	8	4	2	0	3	5	2	19/06/19	RP
	BPF 1 12-24 cm 1:20	SYBR	53248.8	19511.3	50139.9	23879.6	5.99703	16.3667	491	9	8	15	18	21	14	26	15	16	18	26	13	16	15	29	18	19	21	16	10	9	12	16	15	3	7	21	20	22	23	30/06/19	RP
	BPF 1 24-36 cm 1:20	SYBR	34713.2	16613.7	31604.3	20982	5.16887	10.8	324	6	4	2	3	8	11	8	21	7	4	3	17	9	8	9	16	12	12	17	12	12	15	12	17	12	18	15	12	5	17	30/06/20	RP
	BPF 1 36-48 cm 1:20	SYBR	35408.4	12952.4	32299.5	17320.8	3.99943	10.9333	328	4	7	17	19	9	16	12	16	16	12	9	12	8	14	10	12	15	18	9	9	6	7	13	8	7	8	7	6	11	11	30/06/21	RP
	BPF 1 48-58 cm 1:20	SYBR	27764.9	9953.04	24656.1	14321.4	2.71247	7.56667	227	5	7	9	7	6	4	7	15	12	10	9	7	10	7	11	2	7	9	5	6	10	7	8	5	8	5	5	8	5	11	30/06/22	RP
	BPF 2 0-12 cm 1:20	SYBR	24605.8	8944.34	21497	13312.7	2.7384	7.53333	226	8	13	9	8	10	8	6	10	7	11	5	8	11	8	6	8	7	15	8	5	6	6	4	7	9	5	5	3	3	7	30/06/23	RP
	BPF 2 12-20 cm 1:20	SYBR	88128.3	30930.4	85019.5	35298.7	6.42275	18.3	549	10	8	7	17	21	16	18	21	19	17	14	9	23	20	20	21	30	8	14	32	19	18	21	29	13	25	26	18	14	21	30/06/24	RP
	BPF 2 20-30 cm 1:20	SYBR	25502.1	11036	22393.2	15404.4	2.87058	6.63333	199	16	7	3	2	9	6	6	8	6	5	4	2	8	3	5	6	7	6	11	5	6	5	8	9	9	7	9	4	9	8	30/06/25	RP
	PBS Dilution 1:20		3108.84	4368.34			0.889918	0.633333	19	0	2	0	2	0	1	0	0	1	0	2	0	1	0	1	2	0	0	2	1	0	0	0	1	3	0	0	0	0	0	30/06/26	RP

## Sheet: Sheet 4- Amount sample used
2015-11-20
sample	grams	1x PBS (mL)	Initials	g/ml after PFA addition	g added to filter (g/mL)*(mL/uL)*50uL
BPF1 0-12 cm 1:10	30	20	RP	1.5	0.075
BPF1 0-12 cm 1:20	30	20	RP	1.5	0.075
BPF1 0-12 cm 1:40	30	20	RP	1.5	0.075
BPF 1 12-24 cm 1:20	30.175	20	RP	1.50875	0.0754375
BPF 1 24-36 cm 1:20	30.544	20	RP	1.5272	0.07636
BPF 1 36-48 cm 1:20	30.314	20	RP	1.5157	0.075785
BPF 1 48-58 cm 1:20	26.755	20	RP	1.33775	0.0668875
BPF 2 0-12 cm 1:20	30.057	20	RP	1.50285	0.0751425
BPF 2 12-20 cm 1:20	20.386	20	RP	1.0193	0.050965
BPF 2 20-30 cm 1:20	25.536	20	RP	1.2768	0.06384
PBS Dilution 1:20	1	1	RP	1	0.05

## Sheet: Sheet 5- SoilSlurryForR
SITE	DEPTH	NORMALIZED CELLS	NORMALIZED STD
BPF1	0-12	178404	37640.6	79139.2	12975.9
BPF1	12-24	50014.2	22120.2
BPF1	24-36	8999.28	11867.7
BPF1	36-48	50139.9	23879.6
BPF1	48-58	31604.3	20982
BPF2	0-12	32299.5	17320.8	26150.9	2084.8
BPF2	12-20	24656.1	14321.4
BPF2	20-30	21497	13312.7

## Sheet: Sheet6- Elemental Analyzer
BPF	top_depth	bottom_depth	Total Carbon Percent	Inorganic Carbon	Organic Carbon	Total Nitrogen	Inorganic Nitrogen	Organic Nitrogen	d13C Total	d13C Inorganic	d13C Organic	DNA	d15N Total	d15N Inorganic	d15N Organic	Water by weight	C/N			avg org C%	avg N%	avg C/N	[DNA]
BPF1	0	2	3.4057			0.1974	-0.0004		-26.672			0.394	0.925	338.668		43.9024	17.2528		BPF1	1.99338	0.144318	15.5309	0.967862
BPF1	2	4	1.378	0.3322		0.09313	0.02243		-25.582	-25.7457		1.7	2.837	-0.23938		37.9442	14.7965		BPF2	1.57129	0.0771333	29.2665	0.539067
BPF1	4	6	1.8357	0.1841		0.12688	0.01108		-25.554	-25.8052		1.29	2.607	-10.9796		30.1811	14.468			std
BPF1	6	8	1.6964			0.11415	-0.00315		-25.471			0.226	2.312	53.142		37.2385	14.8611		BPF1	0.687376	0.0526236	1.72597	0.721137
BPF1	8	10	1.4316	0.0965		0.09167	-0.00353		-25.396	-26.1016		1.08	2.529	44.8701		33.8295	15.6169		BPF2	0.373676	0.0175172	9.57209	0.477944
BPF1	10	12	2.0139	0.2277		0.13928	0.00608		-25.564	-25.8229		0.49	2.488	-19.6828		37.9085	14.4594
BPF1	12	14	2.1976			0.16855	0.00645		-25.63			0.664	2.365	-21.5856		30.695	13.0383		tTest	0.0116623	2.16522e-07	6.79872e-05	0.0189785
BPF1	14	16	2.3798			0.17393	0.00513		-25.61			0.436	2.236	-31.853		29.5269	13.6825
BPF1	16	18	2.4643	0.546		0.17671	0.02811		-25.703	-26.1211		0.488	2.281	-4.10494		29.7332	13.9454
BPF1	18	20	2.5051	0.4326		0.17473	0.02083		-25.81	-26.9454		1.13	2.15	-6.08066		29.2135	14.337
BPF1	20	22	2.6656	0.2192		0.1816	-0.0004		-25.824	-28.324		1.85	2.153	469.893		24.8349	14.6784
BPF1	22	24	2.1625	0.1706		0.13379	0.00109		-25.77	-26.5523		1.09	1.688	-156.091		19.5925	16.1634
BPF1	24	26	2.5362			0.16206	-4e-05		-25.712			0.57	1.959	3511.42		17.474	15.6498
BPF1	26	28	2.1748	0.2929		0.14387	0.00507		-25.765	-26.8187		0.37	1.802	-33.5961		18.9542	15.1164
BPF1	28	30	1.7351			0.09972	-0.01818		-25.551			0.948	2.093	12.1709		15.7676	17.3997
BPF1	30	32	1.8718	0.4156		0.11268	0.00778		-25.53	-25.5931		1.03	2.416	-15.355		75.2518	16.6116
BPF1	32	34	1.32	0.2399		0.06832	0.00072		-25.628	-26.1593		1.18	2.482	-144.83		14.527	19.3208
BPF1	34	36	2.7705			0.19042	-0.00058		-25.732			1.22	2.181	262.665		16.1876	14.5494
BPF1	36	38	3.1144	0.3273		0.2272	0.0145		-25.829	-27.3107		2.34	2.221	-6.15498		17.1975	13.7077
BPF1	38	40	4.0518	0.613		0.26775	0.03055		-25.86	-26.6902		1.4	2.381	-0.740257		15.8095	15.1328
BPF1	40	42	2.215	0.1427		0.16187	0.01087		-25.597	-25.1323		2.84	2.386	-7.5186		10.6343	13.6838
BPF1	42	44	2.2998			0.16316	-0.00914		-25.524			2.7	1.971	22.2549		20.098	14.0954
BPF1	44	46	2.6383	1.4462		0.17118	0.08248		-25.685	-25.8202		0.358	2.275	1.05871		23.8702	15.4124
BPF1	46	48	3.0836	0.4499		0.22227	0.02927		-25.822	-26.0971		0.108	2.178	-1.25077		21.6846	13.8732
BPF1	48	50	1.8836	0.4181		0.10442	0.00962		-25.58	-26.0707		0.256	2.407	-8.19641		13.082	18.0387
BPF1	50	52	1.373	0.1175		0.07757	-0.00313		-25.499	-23.5543		0.156	2.095	47.9625		11.9241	17.7001
BPF1	52	54	1.2214	0.0878		0.06509	-0.00101		-25.595	-25.4659		0.726	1.757	120.606		11.5983	18.7648
BPF1	54	56	1.0911			0.05881	-0.01009		-25.587			0.6	2.723	10.5417		10.2081	18.553
BPF1	56	58	1.812			0.117	-0.0071		-25.695			0.428	2.193	25.335		10.0662	15.4872
BPF2	0	2	1.9038	0.2162		0.09605	0.00415		-24.846	-20.5685		0.726	1.905	-16.5193		45.0505	19.8209
BPF2	2	4	2.3924	0.4411		0.09917	0.01117		-24.506	-20.9139		0.46	2.476	-2.44003		38.9535	24.1242
BPF2	4	6	1.9912	0.4681		0.08769	0.00689		-22.653	-13.9328		0.576	2.469	-8.61315		32.3457	22.7073
BPF2	6	8	2.0645	0.7		0.09377	0.02837		-23.277	-19.1621		0.398	2.487	1.64328		37.2093	22.0166
BPF2	8	10	1.8081	0.3122		0.08297	0.00677		-21.764	-4.553		0.416	2.472	-6.40862		34.2324	21.7922
BPF2	10	12	2.3455	0.9136		0.09759	0.01409		-21.297	-14.6751		0.216	2.521	0.772774		22.3301	24.0342
BPF2	12	14	1.8672	0.397		0.07626	0.00116		-20.356	-1.46189		1.83	2.72	-17.7383		20.6989	24.4847
BPF2	14	16	1.9144			0.07512	-0.00698		-21.269			0.406	2.412	13.6919		20.1527	25.4846
BPF2	16	18	2.6073			0.09182	-0.00188		-22.1			0.144	2.47	35.1155		22.8093	28.3958
BPF2	18	20	1.8554	0.3689		0.07318	0.00338		-20.909	-2.7438		0.186	2.25	-15.4065		23.6443	25.3539
BPF2	20	22	1.7207	0.5928		0.05831	0.00371		-18.016	-4.17221		0.392	1.789	-17.6227		18.711	29.5095
BPF2	22	24	2.156	0.4216		0.06859	-0.00661		-17.694	14.2377		0.262	2.186	13.028		17.25	31.4332
BPF2	24	26	2.5751	0.9546		0.05886	-0.00474		-15.528	1.08951		0.302	2.168	14.7538		13.7255	43.7496
BPF2	26	28	2.593	1.3486		0.05104	0.00014		-11.83	-0.481286		0.972	1.561	-819.747		16.8126	50.8033
BPF2	28	30	2.1095	1.1167		0.04658	-0.00172		-13.298	-2.55919		0.8	1.778	63.7256		13.961	45.2877
BPF1_acidified	0	2			3.5016			0.1978			-26.831				1.608		17.7027
BPF1_acidified	2	4			1.0458			0.0707			-25.53				3.813		14.7921
BPF1_acidified	4	6			1.6516			0.1158			-25.526				3.907		14.2625
BPF1_acidified	6	8			1.6405			0.1173			-25.433				3.677		13.9855
BPF1_acidified	8	10			1.3351			0.0952			-25.345				4.099		14.0242
BPF1_acidified	10	12			1.7862			0.1332			-25.531				3.5		13.4099
BPF1_acidified	12	14			2.2333			0.1621			-25.738				3.318		13.7773
BPF1_acidified	14	16			2.6234			0.1688			-25.47				3.272		15.5415
BPF1_acidified	16	18			1.9183			0.1486			-25.584				3.489		12.9092
BPF1_acidified	18	20			2.0725			0.1539			-25.573				3.264		13.4665
BPF1_acidified	20	22			2.4464			0.182			-25.6				3.181		13.4418
BPF1_acidified	22	24			1.9919			0.1327			-25.703				2.984		15.0106
BPF1_acidified	24	26			2.9052			0.1621			-25.722				2.825		17.9223
BPF1_acidified	26	28			1.8819			0.1388			-25.601				3.095		13.5584
BPF1_acidified	28	30			1.911			0.1179			-25.671				3.647		16.2087
BPF1_acidified	30	32			1.4562			0.1049			-25.512				3.734		13.8818
BPF1_acidified	32	34			1.0801			0.0676			-25.51				4.051		15.9778
BPF1_acidified	34	36			2.8559			0.191			-25.736				2.972		14.9524
BPF1_acidified	36	38			2.7871			0.2127			-25.655				2.792		13.1034
BPF1_acidified	38	40			3.4388			0.2372			-25.712				2.783		14.4975
BPF1_acidified	40	42			2.0723			0.151			-25.629				3.099		13.7238
BPF1_acidified	42	44			2.3192			0.1723			-25.525				3.047		13.4602
BPF1_acidified	44	46			1.1921			0.0887			-25.521				3.406		13.4397
BPF1_acidified	46	48			2.6337			0.193			-25.775				2.698		13.6461
BPF1_acidified	48	50			1.4655			0.0948			-25.44				3.483		15.4589
BPF1_acidified	50	52			1.2555			0.0807			-25.681				3.874		15.5576
BPF1_acidified	52	54			1.1336			0.0661			-25.605				3.573		17.1498
BPF1_acidified	54	56			1.292			0.0689			-25.633				3.868		18.7518
BPF1_acidified	56	58			1.8812			0.1241			-25.822				3.517		15.1587
BPF2_acidified	0	2			1.6876			0.0919			-25.394				2.737		18.3634
BPF2_acidified	2	4			1.9513			0.088			-25.318				3.1		22.1739
BPF2_acidified	4	6			1.5231			0.0808			-25.333				3.414		18.8502
BPF2_acidified	6	8			1.3645			0.0654			-25.388				2.853		20.8639
BPF2_acidified	8	10			1.4959			0.0762			-25.356				3.261		19.6312
BPF2_acidified	10	12			1.4319			0.0835			-25.522				2.816		17.1485
BPF2_acidified	12	14			1.4702			0.0751			-25.458				3.036		19.5766
BPF2_acidified	14	16			1.9009			0.0821			-25.319				3.371		23.1535
BPF2_acidified	16	18			2.5375			0.0937			-25.445				3.125		27.0811
BPF2_acidified	18	20			1.4865			0.0698			-25.417				3.105		21.2966
BPF2_acidified	20	22			1.1279			0.0546			-25.292				3.108		20.6575
BPF2_acidified	22	24			1.7344			0.0752			-25.456				3.139		23.0638
BPF2_acidified	24	26			1.6205			0.0636			-25.317				3.106		25.4796
BPF2_acidified	26	28			1.2444			0.0509			-24.129				3.82		24.4479
BPF2_acidified	28	30			0.9928			0.0483			-25.377				3.984		20.5549

## Sheet: Sheet7-Soil Extractables
Sample	sample	top_depth	bottom_depth	mg DOC g dry soil-1	Mean ug NO3-N g soil-1	Mean ug NH4-N g soil-1	Mean ug PO4-P g soil	Sum of NH4 and NO3
1	BPF1	0	2	2.50743	0.00236985	0.0752534	0.00177624	0.0776233
2	BPF1	2	4	3.2131	0.00401698	0.0402039	0.00115993	0.0442208
3	BPF1	4	6	1.2973	0.0325674	0.0552251	0.000514286	0.0877925
4	BPF1	6	8	1.61715	0.0386069	0.0547482	0.00124798	0.0933551
5	BPF1	8	10	1.5841	0.0342145	0.0528408	0.000465373	0.0870553
6	BPF1	10	12	1.16726	0.0375088	0.0354352	0.000817545	0.072944
7	BPF1	12	14	0.903884	0.0358617	0.0461647	0.000944718	0.0820263
8	BPF1	14	16	0.736653	-0.00861107	0.0440188	0.00087624	0.0354077
9	BPF1	16	18	0.882343	0.00511508	0.0506949	0.000289287	0.05581
10	BPF1	18	20	0.930916	0.00676221	0.0375811	0.000259939	0.0443433
11	BPF1	20	22	0.821338	0.0237826	0.0449725	8.38533e-05	0.0687552
12	BPF1	22	24	1.65951	0.0336655	0.0459262	0.000582764	0.0795917
13	BPF1	24	26	0.51948	0.0287241	0.0435419	0.00108167	0.072266
14	BPF1	26	28	0.314489	0.0221355	0.0425882	0.000749067	0.0647237
15	BPF1	28	30	0.601008	0.0100565	0.0526024	0.00144363	0.0626588
16	BPF1	30	32	1.65234	0.00127175	0.0545098	0.000631676	0.0557816
17	BPF1	32	34	0.424142	-0.00147348	0.0595169	0.00075885	0.0580434
18	BPF1	34	36	0.308742	0.0133508	0.0526024	8.38533e-05	0.0659531
19	BPF1	36	38	0.432987	0.0309202	0.0480721	0.000367547	0.0789924
20	BPF1	38	40	0.376066	0.00209532	0.0354352	0.000729502	0.0375305
21	BPF1	40	42	0.394153	0.0149979	0.0430651	0.00141428	0.058063
22	BPF1	42	44	0.39505	0.0144489	0.0371042	0.000983848	0.0515531
23	BPF1	44	46	0.412039	0.0248807	0.0423498	0.000592546	0.0672305
24	BPF1	46	48	1.07993	0.0292731	0.0583247	0.000572981	0.0875978
25	BPF1	48	50	0.396417	-0.012	0.0425659	5.94197e-05	0.0305659
26	BPF1	50	52	1.5761	-0.0117361	0.0281097	-0.000198248	0.0163736
27	BPF1	52	54	0.444865	0.00550155	0.0388352	0.000119725	0.0443368
28	BPF1	54	56	0.674388	-5.89835e-05	0.0472291	0.00129294	0.0471702
29	BPF1	56	58	0.634623	0.0216271	0.0365036	0.000256783	0.0581307
30	BPF2	0	2	2.54853	0.0171787	0.181532	-0.000461399	0.19871
31	BPF2	2	4	1.00365	0.0282998	0.0661154	-0.00015439	0.0944152
32	BPF2	4	6	0.983827	0.020515	0.0474623	0.000119725	0.0679773
33	BPF2	6	8	1.1888	0.0494298	0.0320735	0.000152619	0.0815033
34	BPF2	8	10	0.72882	0.00272128	0.0169178	-0.00015439	0.0196391
35	BPF2	10	12	0.553854	0.00883787	0.0388352	-0.000176319	0.0476731
36	BPF2	12	14	0.658972	0.0355284	0.0514261	0.000207442	0.0869545
37	BPF2	14	16	0.930497	0.0449814	0.0400011	-0.000505257	0.0849824
38	BPF2	16	18	1.4143	0.0252415	0.0402342	-0.000571045	0.0654757
39	BPF2	18	20	0.840561	0.0255195	0.034172	-0.000121496	0.0596914
40	BPF2	20	22	1.12323	0.00605761	0.0288092	4.29728e-05	0.0348668
41	BPF2	22	24	1.24171	-0.00450741	0.0448975	0.000262265	0.0403901
42	BPF2	24	26	0.928303	0.00661366	0.0637838	0.000492521	0.0703974
43	BPF2	26	28	0.823848	0.00160918	0.0390684	0.000514451	0.0406776
44	BPF2	28	30	0.975231	0.0194029	0.0337056	0.000744707	0.0531085
			BPF 1 AVERAGE	0.964062	0.0151681	0.0464145	0.000688215	0.0615826
			BPF 2 AVERAGE	1.06294	0.0191619	0.0506022	2.61605e-05	0.0697642
			STD BPF1	0.698723	0.0156496	0.00946065	0.00048317	0.0191415
			STD BPF2	0.468708	0.0160173	0.0383589	0.000386434	0.0415999
